# Supplementary figures and images for: A flexible framework for simulating and fitting generalized drift-diffusion models
Source: eLife journal article supplement (doi:10.7554/elife.56938), 2020-08-04

**a****Trial-wise trajectories**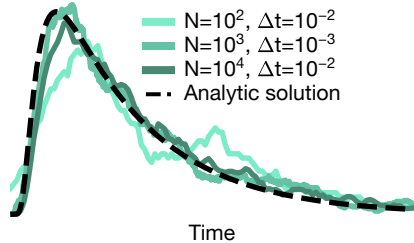**Forward Euler**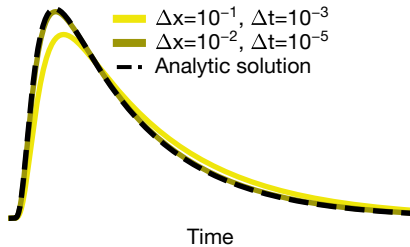**Backward Euler**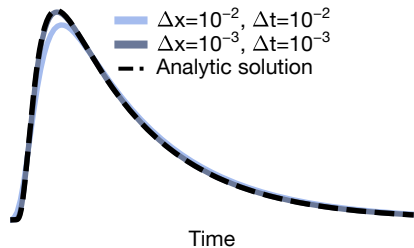**Crank-Nicolson**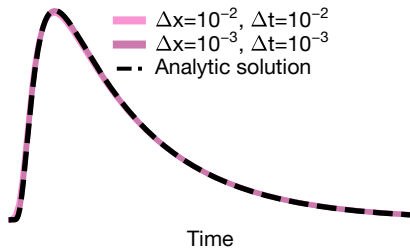**b**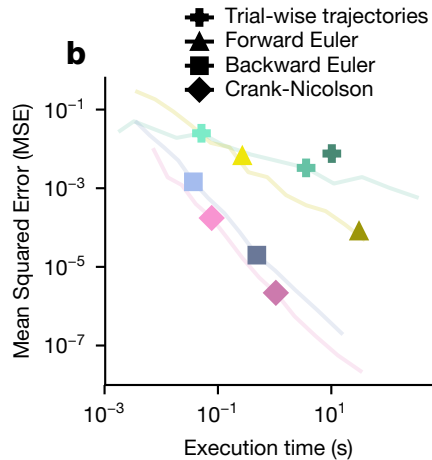

Supplement: supp [file elife-56938-supp-v1.zip]

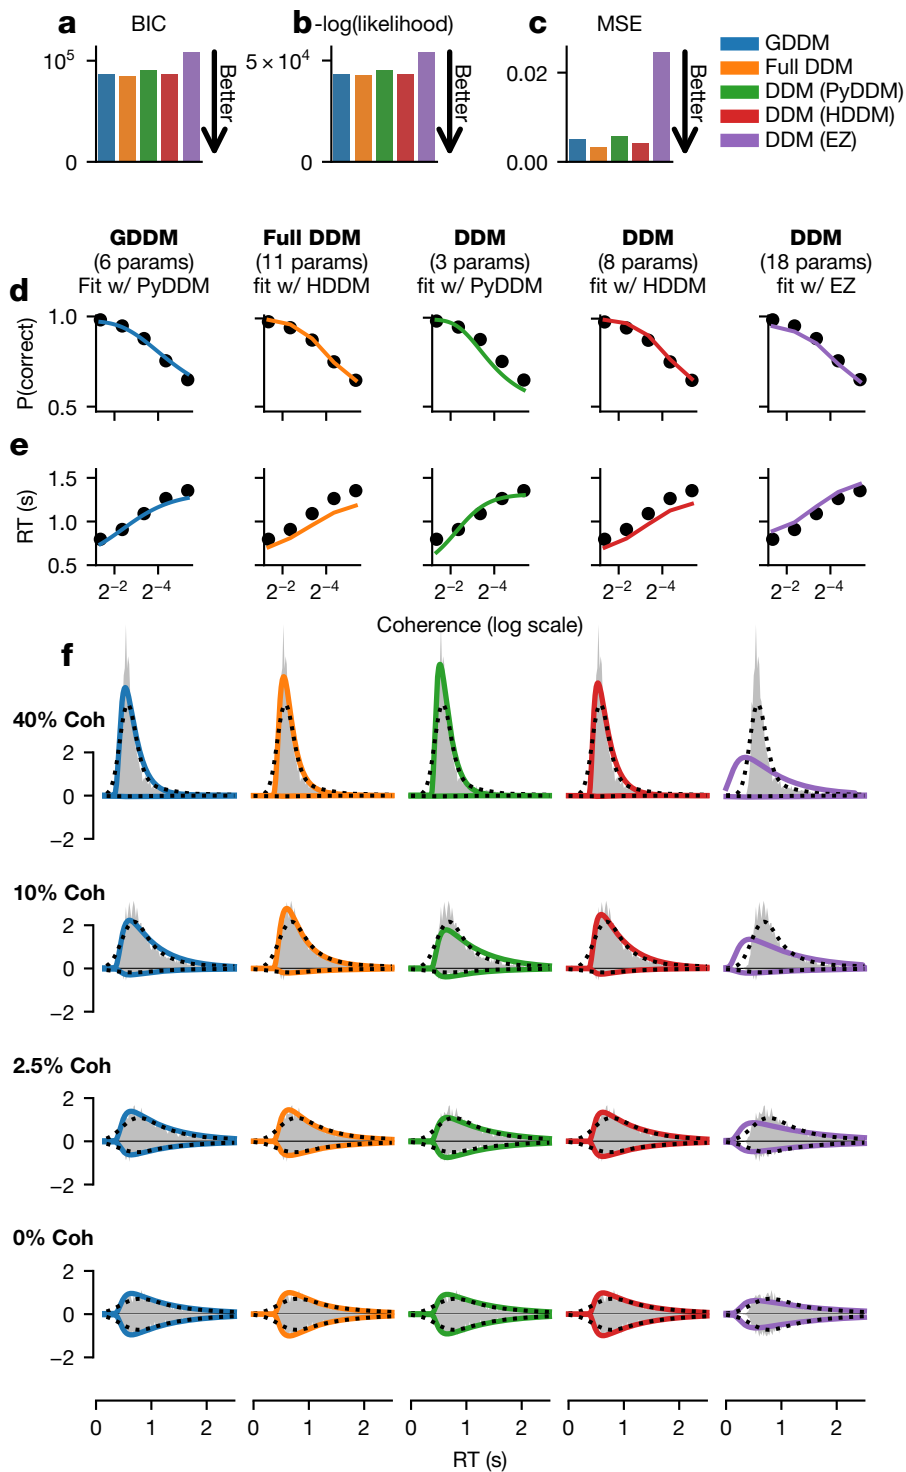

Supplement: supp [file elife-56938-supp-v1.zip]

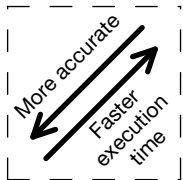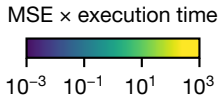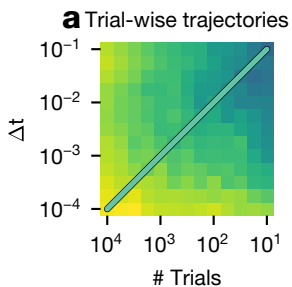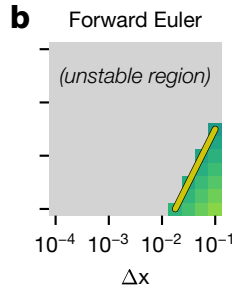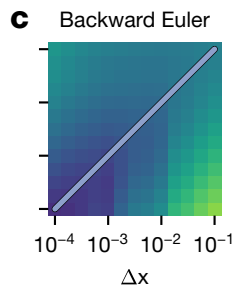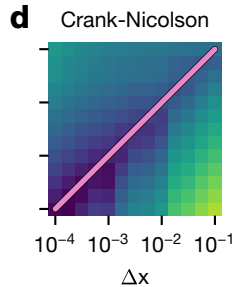

Supplement: supp [file elife-56938-supp-v1.zip]

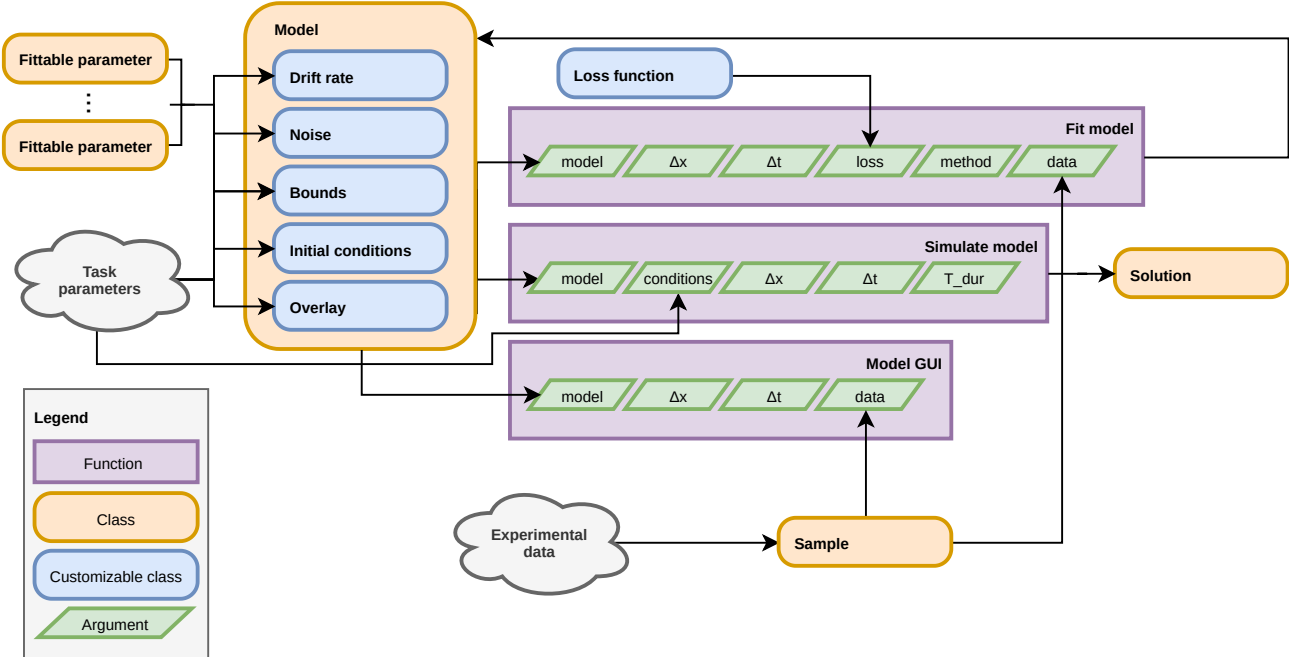

Supplement: supp [file elife-56938-supp-v1.zip]

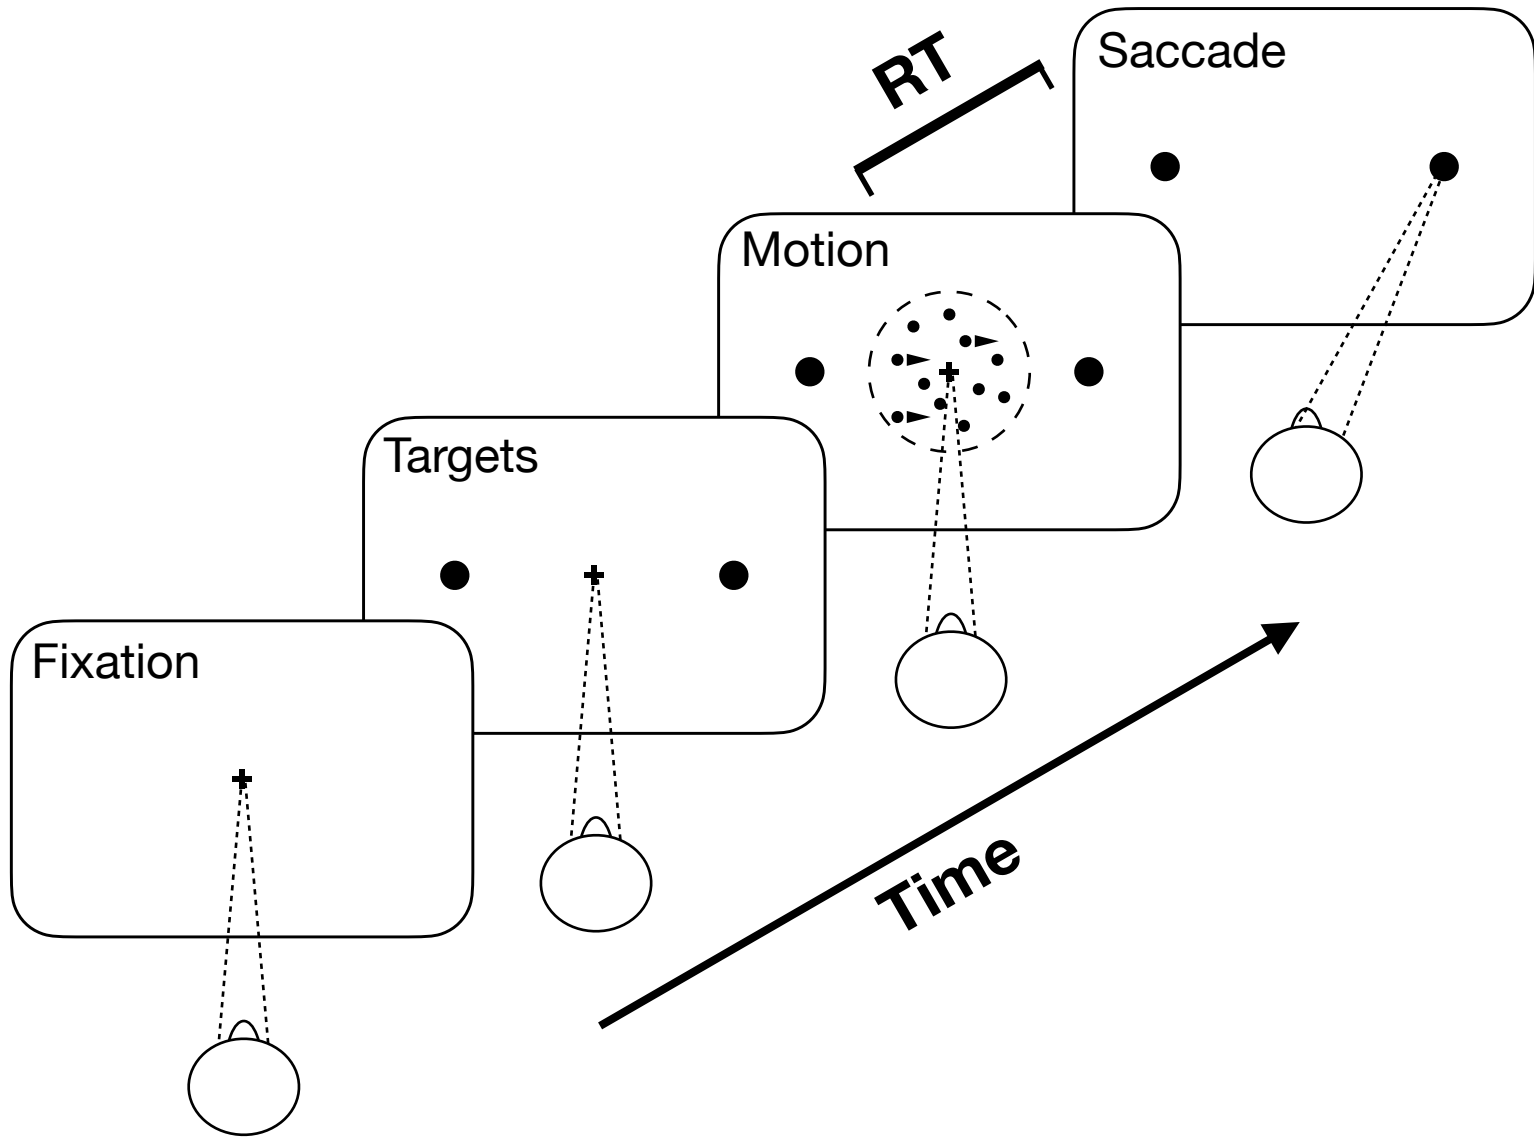

Supplement: supp [file elife-56938-supp-v1.zip]

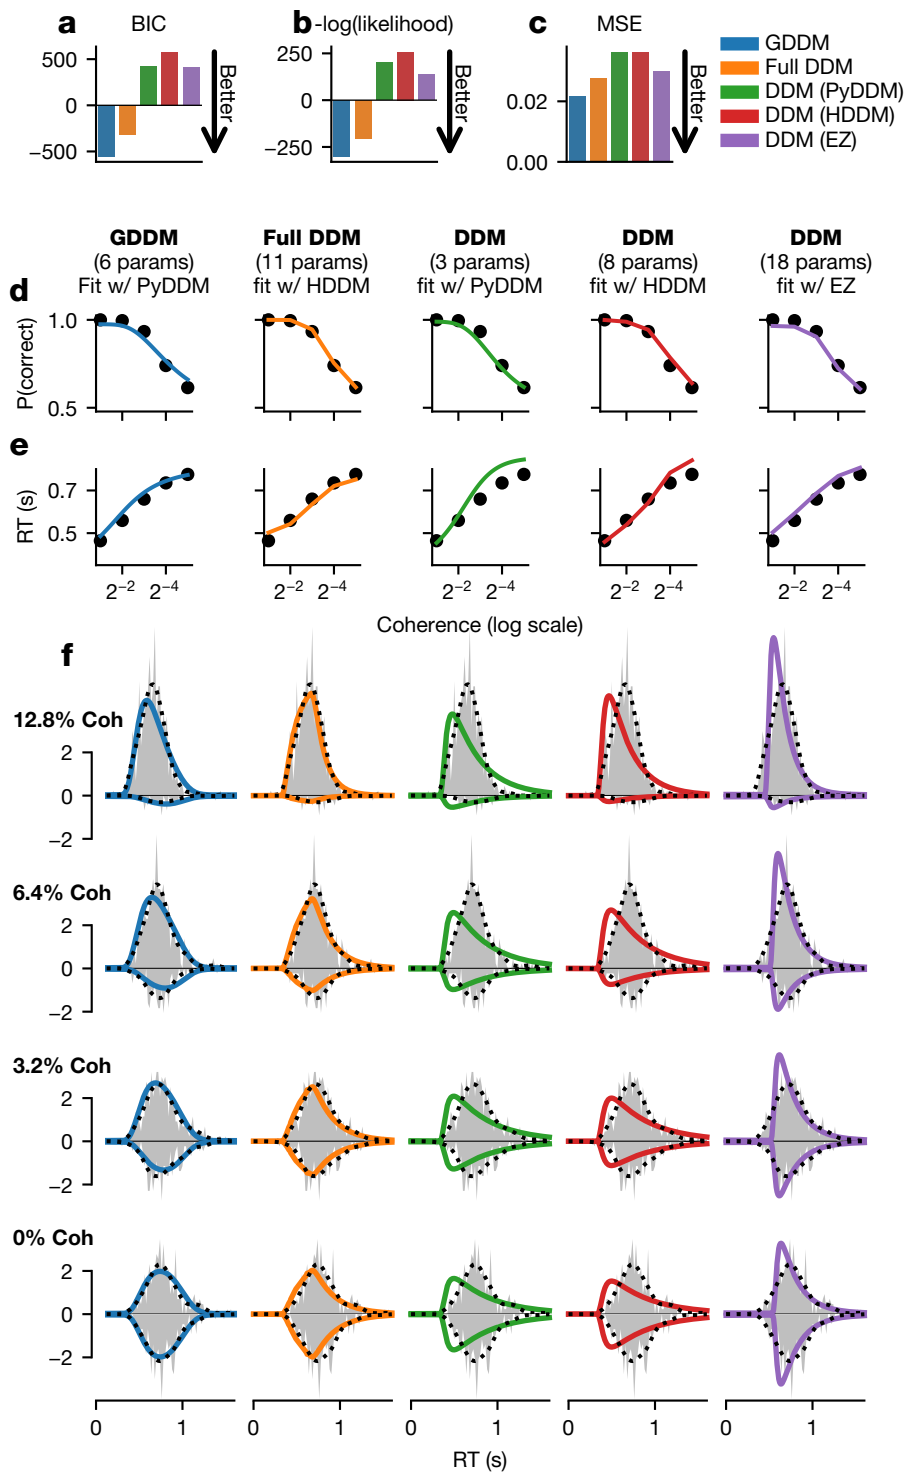

Supplement: supp [file elife-56938-supp-v1.zip]
